# Supplementary material for: Dynamics of Gut Microbiota Recovery after Antibiotic Exposure in Young and Old Mice (A Pilot Study)
Source: MDPI journal article supplement (doi:10.3390/microorganisms9030647), 2021-03-20
Supplement: s1 [file s1]

**Table S1.** List of the most abundant genera in fecal samples of young and older mice.

| <b>Genera <u>decreasing</u> with age</b> |                                          |                                          |             |                                   |
|------------------------------------------|------------------------------------------|------------------------------------------|-------------|-----------------------------------|
| Taxa                                     | Average relative abundance in young mice | Average relative abundance in older mice | Fold change | statistical significance (DESeq2) |
| <i>Candidatus_Stoquefichus</i>           | 0.198%                                   | 0.000%                                   | -1.00       |                                   |
| <i>Candidatus_Arthromitus</i>            | 0.147%                                   | 0.000%                                   | -1.00       |                                   |
| <i>Butyricicoccus</i>                    | 0.146%                                   | 0.000%                                   | -1.00       |                                   |
| <i>Harryflintia</i>                      | 0.092%                                   | 0.000%                                   | -1.00       |                                   |
| <i>Anaerotruncus</i>                     | 0.043%                                   | 0.000%                                   | -1.00       |                                   |
| <i>Ruminococcaceae_UCG-003</i>           | 0.013%                                   | 0.000%                                   | -1.00       |                                   |
| <i>Lactonifactor</i>                     | 0.006%                                   | 0.000%                                   | -1.00       |                                   |
| <i>XBB1006</i>                           | 0.006%                                   | 0.000%                                   | -1.00       |                                   |
| <i>Ruminococcaceae_UCG-014</i>           | 9.961%                                   | 0.302%                                   | -0.97       |                                   |
| <i>Lachnospiraceae_UCG-006</i>           | 0.171%                                   | 0.007%                                   | -0.96       |                                   |
| <i>Ruminococcaceae_NK4A214_group</i>     | 0.131%                                   | 0.011%                                   | -0.91       |                                   |
| <i>Lachnospiraceae_UCG-001</i>           | 7.983%                                   | 0.940%                                   | -0.88       |                                   |
| <i>Anaerovorax</i>                       | 0.054%                                   | 0.012%                                   | -0.78       |                                   |
| <i>Ruminococcus_1</i>                    | 1.296%                                   | 0.300%                                   | -0.77       |                                   |
| <i>Ruminiclostridium_6</i>               | 1.891%                                   | 0.478%                                   | -0.75       |                                   |
| <i>Ruminiclostridium</i>                 | 3.663%                                   | 1.094%                                   | -0.70       |                                   |
| <i>GCA-900066575</i>                     | 0.396%                                   | 0.142%                                   | -0.64       |                                   |
| <i>Lachnoclostridium</i>                 | 1.471%                                   | 0.561%                                   | -0.62       |                                   |
| <i>Roseburia</i>                         | 1.607%                                   | 0.638%                                   | -0.60       | *                                 |
| <i>Shuttleworthia</i>                    | 0.096%                                   | 0.039%                                   | -0.59       |                                   |
| <i>Parabacteroides</i>                   | 3.119%                                   | 1.279%                                   | -0.59       | *                                 |
| <i>Lachnospiraceae_FCS020_group</i>      | 0.212%                                   | 0.088%                                   | -0.59       | *                                 |
| <i>Coriobacteriaceae_UCG-002</i>         | 0.769%                                   | 0.323%                                   | -0.58       |                                   |
| <i>Lactobacillus</i>                     | 9.680%                                   | 4.150%                                   | -0.57       | *                                 |
| <i>Intestinimonas</i>                    | 0.913%                                   | 0.447%                                   | -0.51       | *                                 |
| <i>Family_XIII_UCG-001</i>               | 0.090%                                   | 0.048%                                   | -0.48       |                                   |
| <i>Muribaculum</i>                       | 1.286%                                   | 0.745%                                   | -0.42       |                                   |
| <i>Oscillibacter</i>                     | 2.619%                                   | 1.529%                                   | -0.42       | *                                 |
| <i>Tyzzereella</i>                       | 0.143%                                   | 0.086%                                   | -0.40       |                                   |
| <i>Ruminiclostridium_9</i>               | 1.592%                                   | 1.049%                                   | -0.34       |                                   |
| <i>Ruminococcaceae_UCG-005</i>           | 0.335%                                   | 0.247%                                   | -0.26       | *                                 |
| <i>Bifidobacterium</i>                   | 8.621%                                   | 7.097%                                   | -0.18       |                                   |
| <i>Turicibacter</i>                      | 1.965%                                   | 1.715%                                   | -0.13       |                                   |
| <i>Ruminiclostridium_5</i>               | 0.429%                                   | 0.388%                                   | -0.10       |                                   |
| <i>Alistipes</i>                         | 11.394%                                  | 10.648%                                  | -0.07       | *                                 |

**Genera increasing with age**

| Taxa                                 | Average<br>relative<br>abundance in<br>young mice | Average<br>relative<br>abundance in<br>older mice | Fold change | statistical<br>significance<br>(DeSeq2) |
|--------------------------------------|---------------------------------------------------|---------------------------------------------------|-------------|-----------------------------------------|
| <i>Desulfovibrio</i>                 | 1.106%                                            | 1.115%                                            | 0.01        |                                         |
| <i>ASF356</i>                        | 0.703%                                            | 0.754%                                            | 0.07        |                                         |
| <i>Acetatifactor</i>                 | 0.445%                                            | 0.494%                                            | 0.11        |                                         |
| <i>Enterorhabdus</i>                 | 0.075%                                            | 0.084%                                            | 0.12        |                                         |
| <i>Bilophila</i>                     | 0.154%                                            | 0.188%                                            | 0.22        |                                         |
| <i>Ruminococcaceae_UCG-009</i>       | 0.303%                                            | 0.381%                                            | 0.26        |                                         |
| <i>Romboutsia</i>                    | 0.222%                                            | 0.446%                                            | 1.01        | *                                       |
| <i>Lachnospiraceae_NK4A136_group</i> | 13.563%                                           | 27.392%                                           | 1.02        | *                                       |
| <i>Ruminococcaceae_UCG-010</i>       | 0.339%                                            | 0.794%                                            | 1.34        | *                                       |
| <i>Clostridium_sensu_stricto_1</i>   | 1.577%                                            | 3.716%                                            | 1.36        | *                                       |
| <i>UBA1819</i>                       | 0.119%                                            | 0.312%                                            | 1.61        |                                         |
| <i>A2</i>                            | 1.028%                                            | 2.695%                                            | 1.62        |                                         |
| <i>Anaeroplasma</i>                  | 6.240%                                            | 16.851%                                           | 1.70        | *                                       |
| <i>Lachnospiraceae_UCG-004</i>       | 0.004%                                            | 0.018%                                            | 3.14        |                                         |
| <i>Faecalibaculum</i>                | 1.584%                                            | 10.256%                                           | 5.47        |                                         |
