# Supplementary material for: Dynamics of Gut Microbiota Recovery after Antibiotic Exposure in Young and Old Mice (A Pilot Study)
Source: MDPI journal article supplement (doi:10.3390/microorganisms9030647), 2021-03-20
Supplement: s1 [file s1]

**Table S3.** List of the most abundant genera in fecal samples of older mice before and after 10-day broad-spectrum antibiotic treatment

| Genus                                | Average relative abundance |           |
|--------------------------------------|----------------------------|-----------|
|                                      | Before Abx                 | After Abx |
| <i>A2</i>                            | 2.70%                      | 0.40%     |
| <i>Acetatifactor</i>                 | 0.49%                      | 0.16%     |
| <i>Alistipes</i>                     | 10.65%                     |           |
| <i>Anaeroplasma</i>                  | 16.85%                     | 0.07%     |
| <i>ASF356</i>                        | 0.75%                      | 0.56%     |
| <i>Bifidobacterium</i>               | 7.10%                      | 28.37%    |
| <i>Bilophila</i>                     | 0.19%                      | 0.09%     |
| <i>Clostridium_sensu_stricto_1</i>   | 3.72%                      |           |
| <i>Coriobacteriaceae_UCG-002</i>     | 0.32%                      |           |
| <i>Desulfovibrio</i>                 | 1.12%                      | 0.29%     |
| <i>Enterorhabdus</i>                 | 0.08%                      | 0.06%     |
| <i>Erysipelatoclostridium</i>        | 0.13%                      | 0.72%     |
| <i>Faecalibaculum</i>                | 10.26%                     |           |
| <i>GCA-900066575</i>                 | 0.14%                      | 0.06%     |
| <i>Intestinimonas</i>                | 0.45%                      | 1.09%     |
| <i>Lachnoclostridium</i>             | 0.56%                      | 0.44%     |
| <i>Lachnospiraceae_FCS020_group</i>  | 0.09%                      | 0.55%     |
| <i>Lachnospiraceae_NK4A136_group</i> | 27.39%                     | 9.43%     |
| <i>Lachnospiraceae_UCG-001</i>       | 0.94%                      | 4.14%     |
| <i>Lactobacillus</i>                 | 4.15%                      | 39.71%    |
| <i>Muribaculum</i>                   | 0.74%                      | 0.24%     |
| <i>Oscillibacter</i>                 | 1.53%                      | 1.47%     |
| <i>Parabacteroides</i>               | 1.28%                      | 8.65%     |
| <i>Romboutsia</i>                    | 0.45%                      |           |
| <i>Roseburia</i>                     | 0.64%                      | 0.72%     |
| <i>Ruminiclostridium</i>             | 1.09%                      | 0.24%     |
| <i>Ruminiclostridium_5</i>           | 0.39%                      | 0.39%     |
| <i>Ruminiclostridium_6</i>           | 0.48%                      | 0.23%     |
| <i>Ruminiclostridium_9</i>           | 1.05%                      | 0.74%     |
| <i>Ruminococcaceae_UCG-005</i>       | 0.25%                      |           |
| <i>Ruminococcaceae_UCG-009</i>       | 0.38%                      |           |
| <i>Ruminococcaceae_UCG-010</i>       | 0.79%                      |           |
| <i>Ruminococcaceae_UCG-014</i>       | 0.30%                      | 0.85%     |
| <i>Ruminococcus_1</i>                | 0.30%                      |           |
| <i>Turicibacter</i>                  | 1.72%                      |           |
| <i>Tyzzerella</i>                    | 0.09%                      | 0.06%     |
