# Supplementary material for: Dynamics of Gut Microbiota Recovery after Antibiotic Exposure in Young and Old Mice (A Pilot Study)
Source: MDPI journal article supplement (doi:10.3390/microorganisms9030647), 2021-03-20
Supplement: s1 [file s1]

**Table S2.** List of the most abundant genera in fecal samples of young mice before and after 10-day broad-spectrum antibiotic treatment.

| Genus                                | Average relative abundance |           |
|--------------------------------------|----------------------------|-----------|
|                                      | Before Abx                 | After Abx |
| A2                                   | 1.03%                      | 0.24%     |
| <i>Acetatifactor</i>                 | 0.44%                      | 0.18%     |
| <i>Alistipes</i>                     | 11.39%                     |           |
| <i>Anaeroplasma</i>                  | 6.24%                      |           |
| <i>Anaerovorax</i>                   | 0.05%                      |           |
| ASF356                               | 0.70%                      | 0.66%     |
| <i>Bifidobacterium</i>               | 8.62%                      | 34.66%    |
| <i>Bilophila</i>                     | 0.15%                      | 0.09%     |
| <i>Butyricicoccus</i>                | 0.15%                      |           |
| <i>Candidatus_Arthromitus</i>        | 0.15%                      |           |
| <i>Candidatus_Stoquefichus</i>       | 0.20%                      |           |
| <i>Clostridium_sensu_stricto_1</i>   | 1.58%                      |           |
| <i>Coriobacteriaceae_UCG-002</i>     | 0.77%                      |           |
| <i>Desulfovibrio</i>                 | 1.11%                      | 0.34%     |
| <i>Enterococcus</i>                  | 2.21%                      |           |
| <i>Enterorhabdus</i>                 | 0.07%                      | 0.13%     |
| <i>Erysipelatoclostridium</i>        | 0.11%                      |           |
| <i>Faecalibaculum</i>                | 1.58%                      |           |
| <i>Family_XIII_UCG-001</i>           | 0.09%                      |           |
| GCA-900066575                        | 0.40%                      | 0.12%     |
| <i>Harryflintia</i>                  | 0.09%                      |           |
| <i>Intestinimonas</i>                | 0.91%                      | 0.58%     |
| <i>Lachnoclostridium</i>             | 1.47%                      | 0.48%     |
| <i>Lachnospiraceae_FCS020_group</i>  | 0.21%                      | 0.29%     |
| <i>Lachnospiraceae_NK4A136_group</i> | 13.56%                     | 10.72%    |
| <i>Lachnospiraceae_UCG-001</i>       | 7.98%                      | 0.82%     |
| <i>Lachnospiraceae_UCG-006</i>       | 0.17%                      |           |
| <i>Lactobacillus</i>                 | 9.68%                      | 35.86%    |
| <i>Muribaculum</i>                   | 1.29%                      | 0.29%     |
| <i>Oscillibacter</i>                 | 2.62%                      | 1.04%     |
| <i>Parabacteroides</i>               | 3.12%                      | 6.50%     |
| <i>Romboutsia</i>                    | 0.22%                      |           |
| <i>Roseburia</i>                     | 1.61%                      | 1.25%     |
| <i>Ruminiclostridium</i>             | 3.66%                      | 0.28%     |
| <i>Ruminiclostridium_5</i>           | 0.43%                      | 0.38%     |
| <i>Ruminiclostridium_6</i>           | 1.89%                      | 0.12%     |
| <i>Ruminiclostridium_9</i>           | 1.59%                      | 0.73%     |
| <i>Ruminococcaceae_NK4A214_group</i> | 0.13%                      |           |
| <i>Ruminococcaceae_UCG-005</i>       | 0.34%                      |           |
| <i>Ruminococcaceae_UCG-009</i>       | 0.30%                      | 0.07%     |
| <i>Ruminococcaceae_UCG-010</i>       | 0.34%                      |           |
| <i>Ruminococcaceae_UCG-014</i>       | 9.96%                      | 1.60%     |
| <i>Ruminococcus_1</i>                | 1.30%                      |           |
| <i>Shuttleworthia</i>                | 0.10%                      |           |
| <i>Turicibacter</i>                  | 1.97%                      |           |
| <i>Tyzzereella</i>                   | 0.14%                      |           |
| UBA1819                              | 0.12%                      |           |
